# Supplementary material for: The pocketome of G protein-coupled receptors reveals previously untargeted allosteric sites
Source: Research Square preprint supplement (doi:10.21203/rs.3.rs-870555/v1), 2021-09-02
Supplement: Supplementary file 1 [file 16cb4a146c15640ab8e041d7.pdf]

# The pocketome of G protein-coupled receptors reveals previously untargeted allosteric sites

## Supplementary Information

Janik B. Hedderich<sup>1</sup>, Margherita Persechino<sup>1</sup>, Katharina Becker<sup>2</sup>,  
Franziska M. Heydenreich<sup>3,4</sup>, Torben Gutermuth<sup>1</sup>,  
Michel Bouvier<sup>4</sup>, Moritz Bünemann<sup>2</sup>, Peter Kolb<sup>1,\*</sup>

<sup>1</sup>Department of Pharmaceutical Chemistry, Philipps-University Marburg, Marburg, Germany

<sup>2</sup>Department of Pharmacology & Clinical Pharmacy, Philipps-University Marburg, Marburg, Germany

<sup>3</sup>Department of Molecular and Cellular Physiology, Stanford University School of Medicine, Stanford, CA, USA

<sup>4</sup>Institute for Research in Immunology and Cancer, Department of Biochemistry and Molecular Medicine, Université de Montréal, Montréal, QC, Canada

\*to whom correspondence should be addressed: peter.kolb@uni-marburg.de

## Supplementary Results

### General Distribution of Pockets

Starting on the outwards-facing portion of the receptor in the region between helices I and II, we identified two regions of interest on the upper and lower portion of the 7TM bundle, referred to as OS1 and OS2, respectively. While OS2 only shows small and scattered densities for classes A, B1, B2, C and D1, OS1 is more defined for classes A and B1. The density maps of classes B2, C, D1 and F show smaller volumes for OS1.

Next, between helices II, III and IV, a well-defined, large density in front of the extracellular ends of helices II and III is visible for classes A, B1, C and F (KS1), while the map only shows a small hotspot for classes B2 and D1. Adjacent to KS1, we identified another site in front of helices III and IV for classes A, B1, B2, C and D1, referred to as KS2. The class F map only shows a smaller, scattered density in this region. Below KS2, the third site of this region, KS3, resides between helices II and IV and appears to be conserved in all of the analysed GPCR classes. For classes A, B1, C and D, KS3 even reaches across helix II down to the intracellular end of helix I near OS2. Notably, the densities of KS2 and KS3 are merged for classes A and B1, while class C, D1 and F show well-separated spots.

The extracellular region at the lateral portion of the 7TM bundle between helices III, IV and V again includes three separate densities. At the upper end, KS4 resides between helices IV and V for classes A, B1, B2, D1 and F. Class C only shows a smaller density that is shifted towards helix V. Below, class A features a large hotspot leaning against helices III and IV (KS5). In direct comparison, the class B1 density in this region is similar in size, but split up into two sub-sites. For classes B2, C, and D1 the densities of KS5 are smaller. The third site, KS6, is located adjacent to KS5 only for classes A, B1 and C. In the density map for class B1, these two sites are connected. The density maps for classes D1 and F show a site that is shifted towards helix V.

Lastly, we identified a larger region of interest in front of helices I, VI, VII and VIII. For class B1, these densities are connected across helix V with the sites described before. Two densities reside in the upper portion of the 7TM bundle, one between helices VI and VII and one in front of helix VII (OS6 and OS7). These two sites seem to be conserved across almost all classes except B2 and D1, where only OS7 is visible. For classes A, B1 and C, the densities of OS7 are shifted towards helix I. Right below OS6 and OS7, two other sites reside at the middle portion of helices VI and VII, referred to as KS7 and OS8. Again, these two sites are conserved across all analysed classes besides class D1. In general, the densities of KS7 and OS8 are rather small and spotty. Here, one exception is OS8 of class F, which shows a large and well-defined hotspot. The last sites described for the outwards-facing receptor regions are located in the lower portion of the 7TM bundle. The first site, KS8, resides between helices VI and VII below KS7. While the maps for classes A, B1, D1 and F show well-defined spots, the densities of class C are rather scattered. For class B2, we could not identify any density near this region. Notably, the densities of KS7 and KS8 are merged for class B1. The next site, KS9, is located around the kink between helices VII and VIII. Regarding its size and position, this spot differs a lot between the classes. While classes C and D1 show larger spots in this region, the densities of classes A and B1 are quite small. The maps of classes B2 and F, on the other hand, do not show any density in this region. Finally, the last spot, OS10, is located next to OS9 between helices I and VIII. Here, a well-defined density is observable for all classes except B2 and D1.

In the vicinity of the orthosteric pocket, two secondary binding pockets are observable. The first of these secondary pockets described here, ORTHO1, shows a lengthy density reaching into the extracellular loops near helices IV, V and VI. While this spot seems to be very specific for class A, some scattered density can also be seen for class C. Class B2 also shows a smaller spot above its orthosteric site. Next, ORTHO2 is located adjacent to the orthosteric site between helices I, II, VI and VII. This region clearly is conserved in classes A and B1, and also the class C density indicates the existence of a secondary site. Interestingly, the location of the orthosteric site and ORTHO2 seem to be switched for class D1. Going down towards the intracellular side, a small density, KS10, is visible below the orthosteric site for class B1. Notably, the class B2 map shows a large spot in this region.

## Identification of Known Pockets

A similar picture as for KS2 emerges for KS5 and KS8. The former resides at the outwards-facing portion of the receptor between helices III, IV and V and is known from class A structures of the FFAR1, C5AR1 and  $\beta_2$ AR. While the approximate location of this site is conserved across all GPCR classes in the density maps, the shapes differ substantially. This is consistent with the similarity matrix, which reveals an overall lower sequence similarity among the different classes (Fig. S5). In direct comparison, the physicochemical properties of KS8 tend to be conserved for classes A and B1. While some class C GPCRs share a high sequence homology to classes A and B1, the properties of class F KS8 are dissimilar to those of the other classes. The densities, however, show up at the lower portion of the 7TM bundle in front of helices VI and VII in all classes. So far, KS8 is known only from class B1 and class C structures.

In the case of KS5, we focused on  $\beta_2$ AR structures, one of them resolved with a PAM

(PDB: 6N48), the other structure including a NAM (PDB: 6OBA) in this region. As seen in Fig. S8, KS5 is mainly apolar with the exception of a few residues. Both allosteric modulators described in their respective structures fill different portions of this binding site: While the NAM is located at the upper part of KS5, the PAM resides at the lower end of the 7TM bundle. By looking at the contact analysis of KS5 (Fig. S7), we found that the residue contacts of helices III, IV and V are mainly important for an active conformation of the receptor. Hence, the region around KS5 seems to cluster together upon activation.

By the time of this analysis, only NAMs are known to modulate the class B1 receptors GLP1R and GLR by addressing KS8, namely ligands PF-06372222, NNC0640 and MK-0893. On the other hand, one PAM binding to this site is known for the class C receptor GABR2 (ligand BHFF). The comparison of inactive and active state class B1 structures shows that the NAMs seem to interfere with the outward movement of helix VI away from helix VII. Our residue contact analysis for B1 structures (Fig. S13) revealed multiple contacts crucial for both an active and inactive state of the receptor.

## Identification of Orphan Pockets

For OS6, the sequence similarity matrix (Fig. S5) shows another interesting pattern. In this region, class A receptors share sequence homology with classes C and F to some extent. Class C and F GPCRs by themselves, however, differ from each other in this region. Regarding OS6, class B1 receptors only show sequence homology within their class. The densities located at the upper portion of the GPCR between helices VI and VII were conserved across all classes besides B2 and D1. Our contact analysis for class A and B1 orphan sites shown in Fig. S9 and S14 reveals multiple contacts conserved for both an active or inactive conformation of the receptor.

## Supplementary Discussion

In order to describe a plausible modulation through KS5, we focused on two  $\beta_2$ AR structures. The particular difference in the binding mode of the allosteric modulators could give insight into the modulation of GPCRs through KS5. By looking at the contact analysis of KS5 (Fig. S7), we found that the residues of helices III, IV and V cluster together upon activation. Hence, addressing the lower portion of KS5 with a ligand acting as a hydrophobic patch could stabilise the formation of active state contacts. This mode of action would be comparable to the stabilisation of an inactive state through KS2. The modulation towards an inactive state through KS5, on the other hand, could be achieved by addressing residue 3.41 in particular. Our contact analysis reveals that besides its major involvement in active state contacts, this residue forms a highly conserved contact in inactive state structures (3.41-4.53). As seen in the inactive  $\beta_2$ AR structure, the NAM interacts with 3.41. In direct comparison to the active structure, this interaction seems to keep the contact between 3.41 and 4.53 intact, which might prevent the formation of the active residue clustering downstream.

In order to elucidate possible modes of action for KS8 in class B1 receptors in more detail, we analysed the interaction patterns of three structures (PDBs: 5VEW, 5VEX, 5EE7) and compared them to our class B1 contact analysis (Fig. S13). We found that all of the NAMs

inserted themselves between the lower regions of helices VI, VII, and VIII. Our B1 contact analysis reveals that a ligand might disrupt important active state contacts that way. Since no complex structure of a PAM with a class B1 GPCR is known, we can only hypothesise about the possible positive allosteric modulation of these receptors. A possible design concept is to address the upper part of the site and disrupt crucial inactive state contacts. Also, analysing the binding mode of the class C PAM does not give further insights into the positive modulation of GPCRs through KS8. This is plausible, since this ligand seems to act as a stabiliser for the functionally important dimerisation of the GABR2 instead of directly interfering with active or inactive residue contacts.

The shapes and sequence similarities of OS6 across all analysed GPCR classes showed patterns that might be interesting for the design of selective allosteric modulators. Without having carried out mutational studies – as for the other two orphan sites described in this work –, we can only hypothesise about the possible allosteric effect of a ligand that binds to this site. Here, our contact analysis could provide the reader with interesting insights into the possible receptor modulation through OS6.



## Supplementary Figures

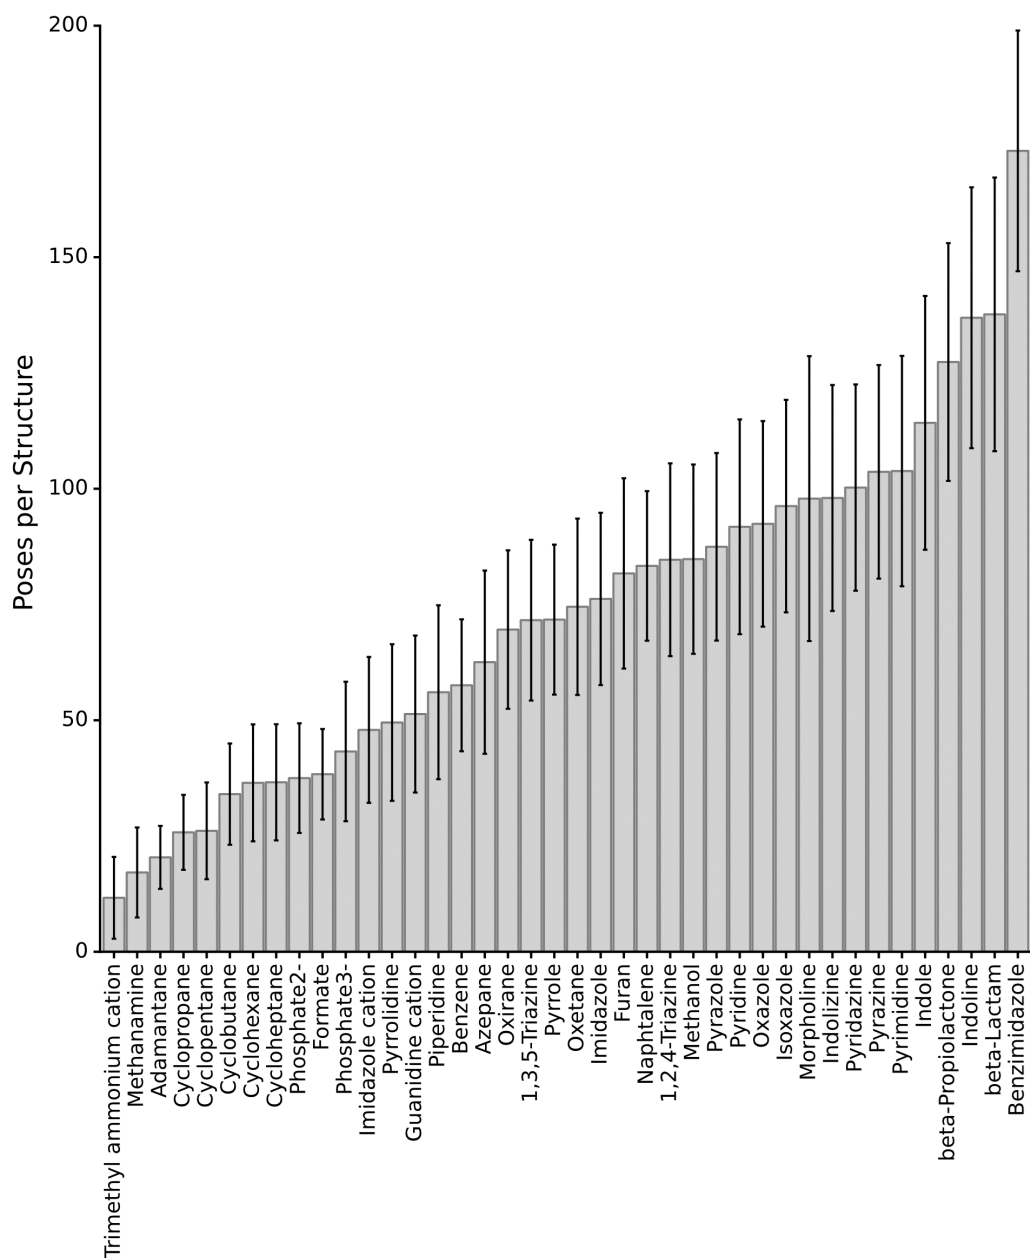

Figure S1: Average number of poses per small molecular probe. Data shown as average  $\pm$  SD across all docking calculations.

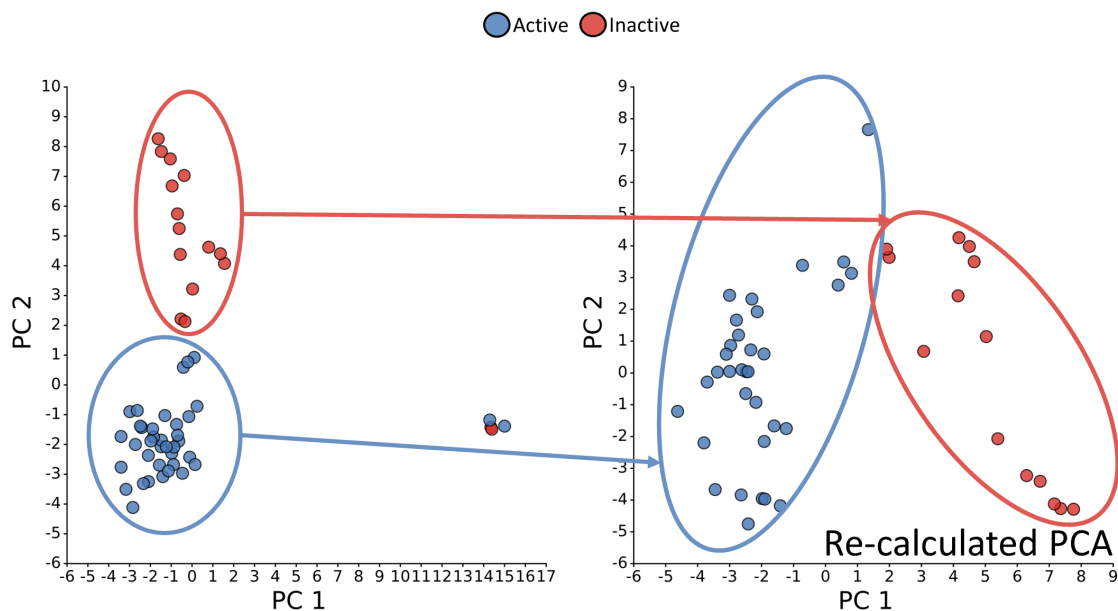

Figure S2: Plot of the first two principal components (PCs) of the residue contact analysis for class B1 structures. Each point represents a PDB structure. They are colored according to the GPCRdb classification into active (blue), and inactive (red).<sup>11</sup> The right panel shows the data re-calculated based on the points in the clearly separated active and inactive clusters. Each PC value for each PDB can be seen as a linear combination of variables (i.e. contacts) that represents the residue contact landscape of a structure in a condensed manner. The first two PCs shown here explained most of the variance across all structural data, hence represent the most interesting PCs for investigating crucial differences between receptor states on the residue contact level.

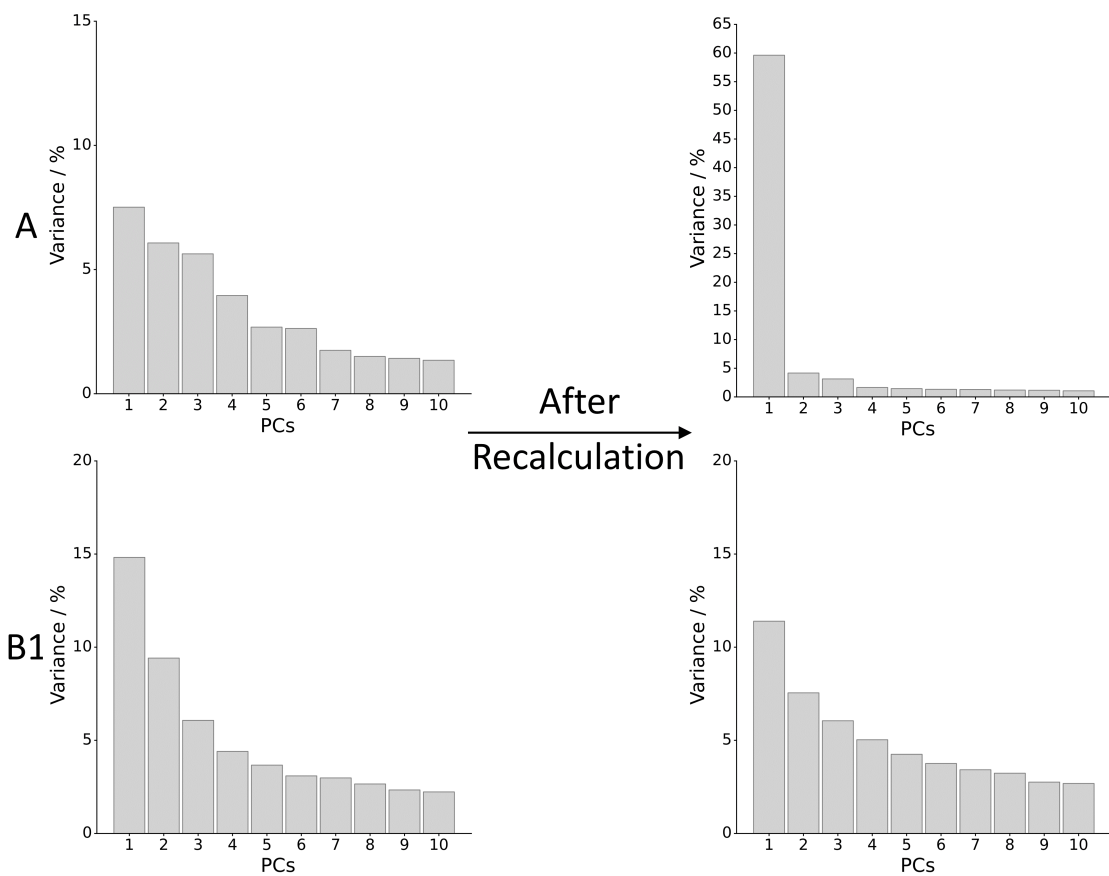

Figure S3: Loadings of the first 10 principal components of the analysis depicted in Fig. 2 and S2. Right panels for each class correspond to the recalculated data based on the two best-defined clusters.

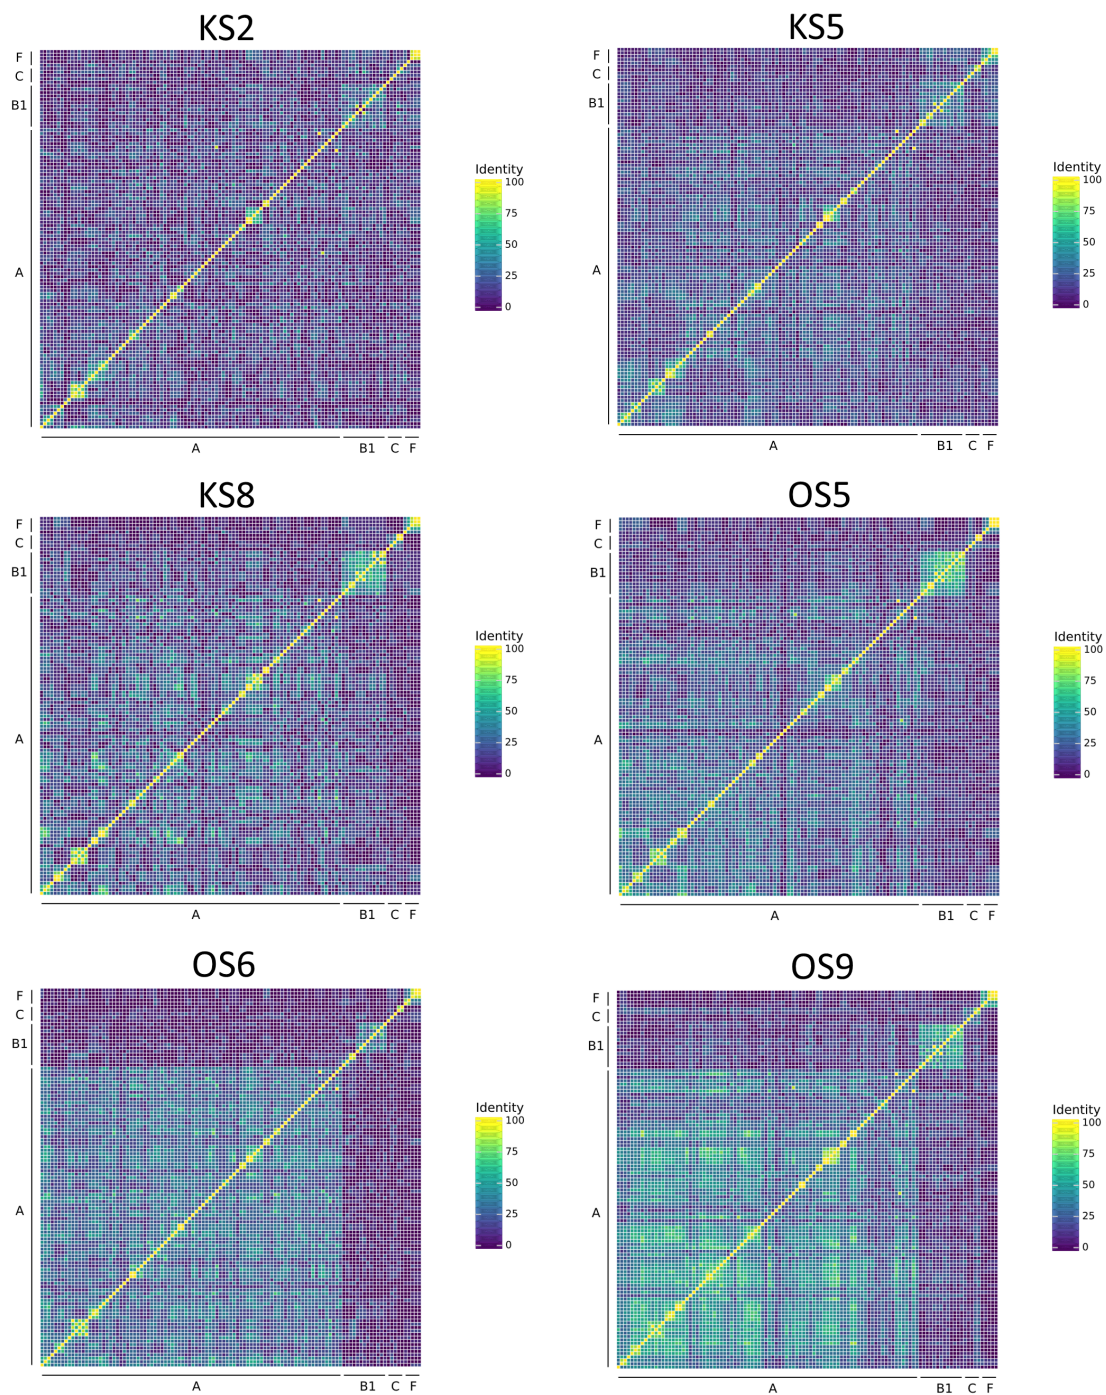

Figure S4: Sequence identities for each of the named pockets across classes A, B1, C and F. Only sequences of structurally resolved and docked receptors were considered.



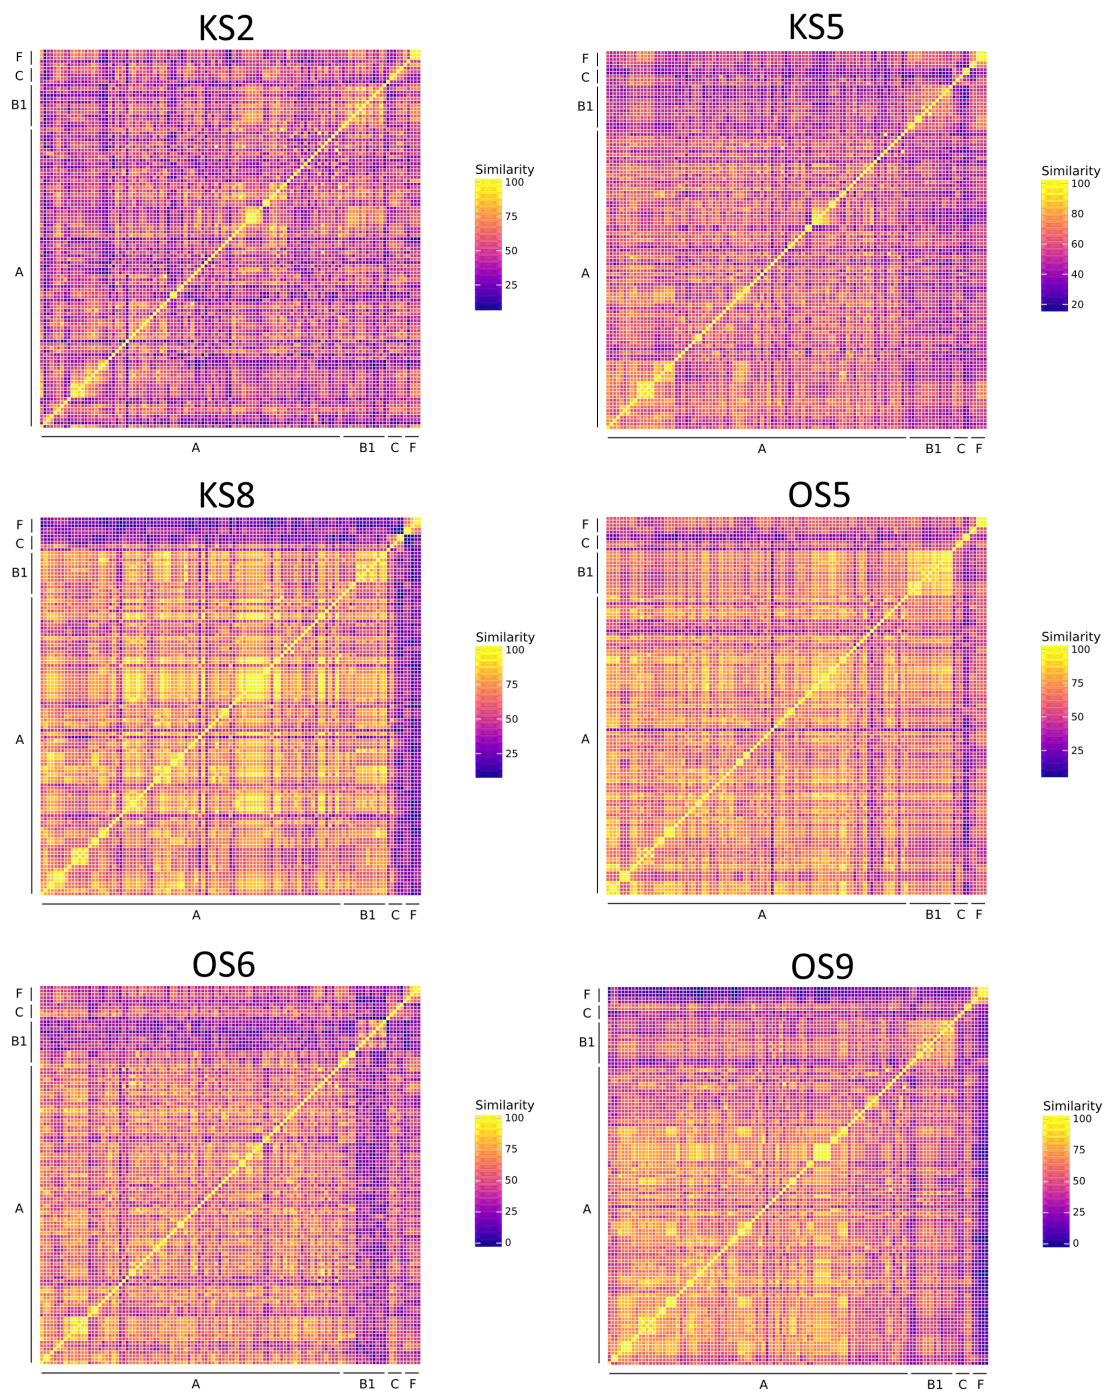

Figure S5: Sequence similarities for each of the named pockets across classes A, B1, C and F. Only sequences of structurally resolved and docked receptors were considered.

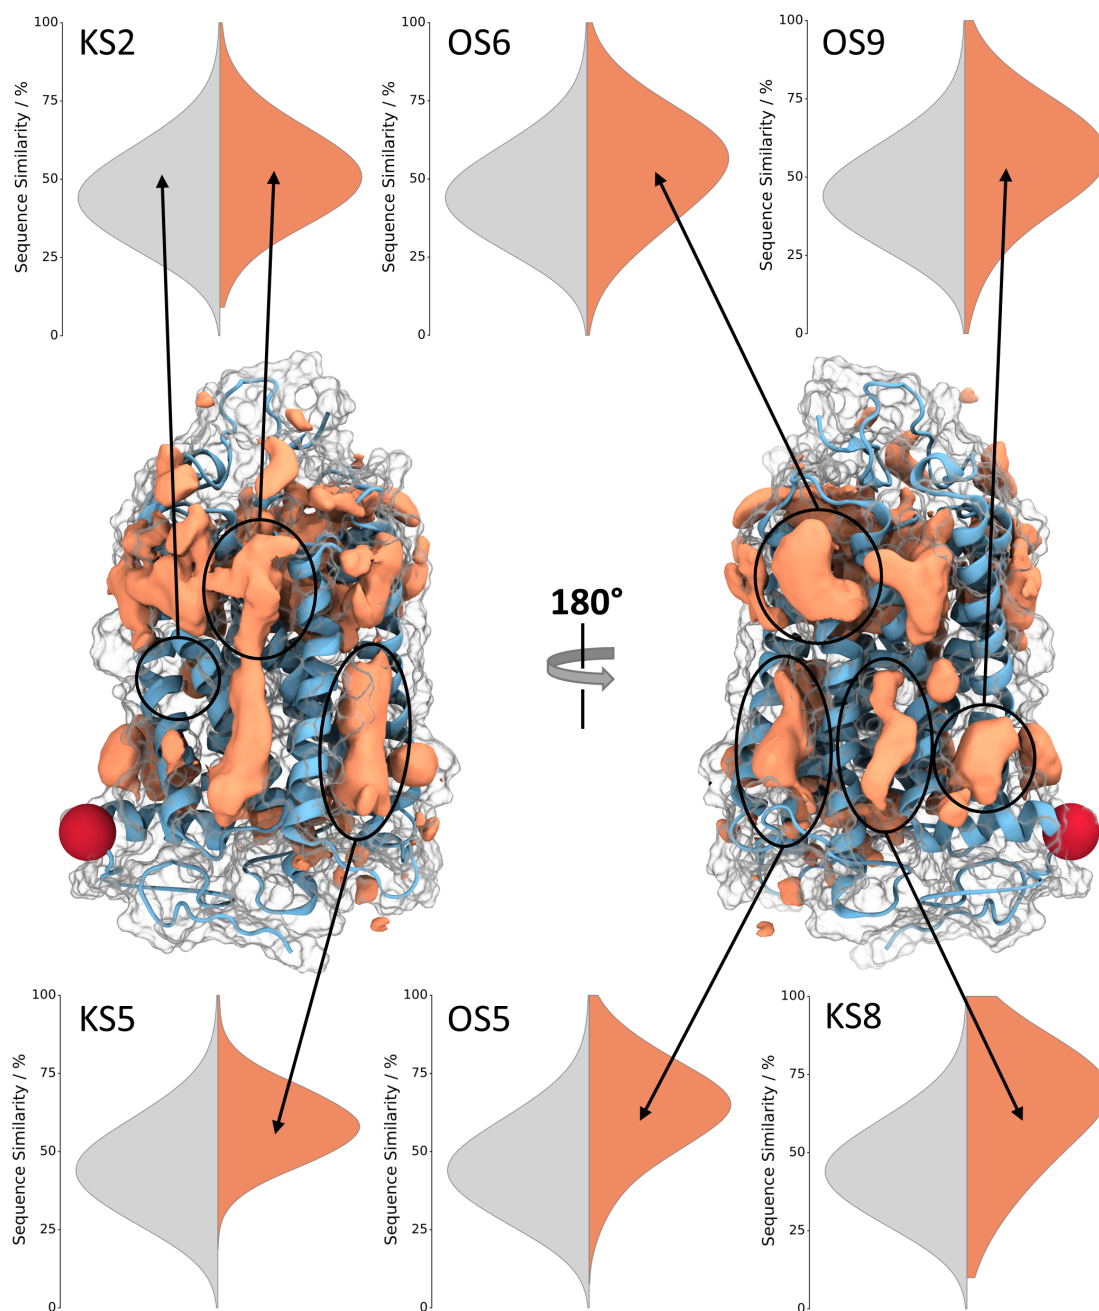

Figure S6: The GPCR pocketome as shown in Fig. 1. For each of the three known and orphan sites, the distribution of sequence similarities across the analysed receptorome (shown in Fig. S5) is depicted. Each of the distributions is directly compared against the sequence similarity distribution of a random stretch of residues across the receptorome (grey; this data is identical for each pocket).

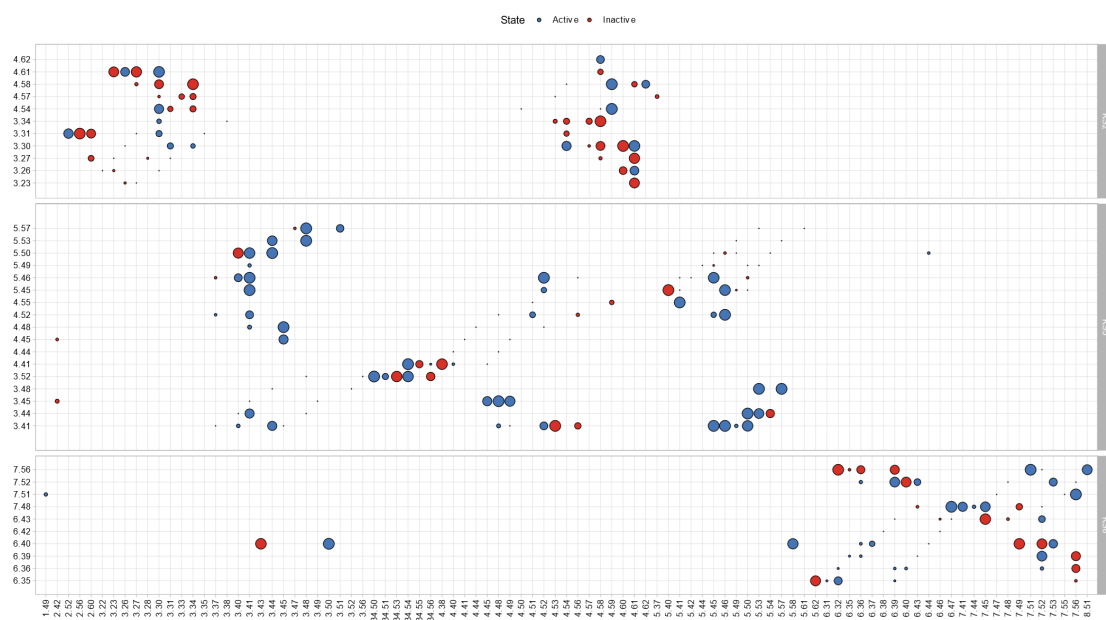

Figure S7: State-specific residue contacts in three known sites of class A GPCR structures (Ballesteros-Weinstein numbering<sup>15</sup>). Points are colored according to the activation state (blue: active, red: inactive). The point size correlates with the normalised PCA coefficient for a given contact and can be seen as a direct measurement of importance for a given state.

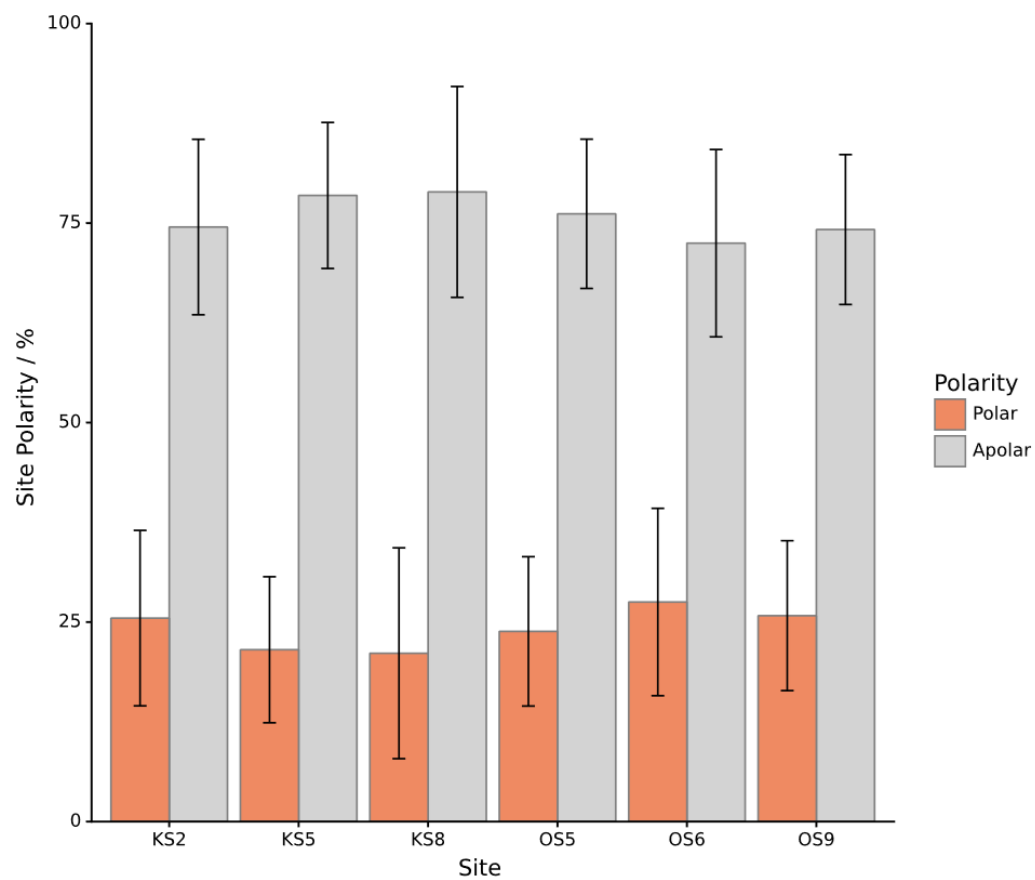

Figure S8: Distribution of apolar and polar residues in each of the six sites discussed. Data shown as average  $\pm$  SD across all 557 structures.



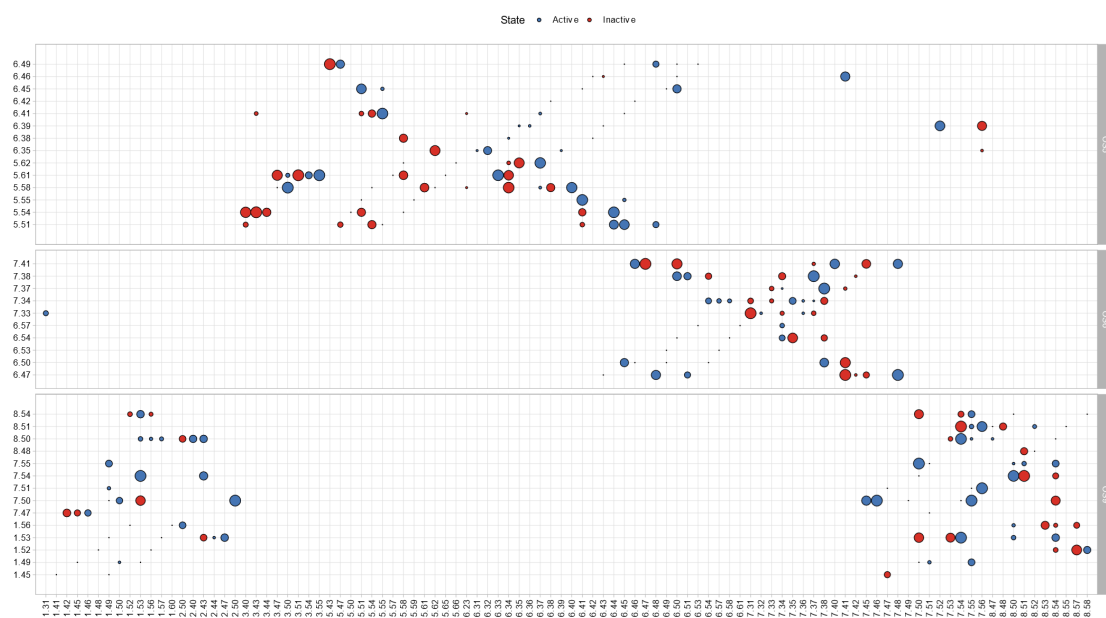

Figure S9: State-specific residue contacts in three orphan sites of class A GPCR structures (Ballesteros-Weinstein numbering<sup>15</sup>). Points are colored according to the activation state (blue: active, red: inactive). The point size correlates with the normalised PCA coefficient for a given contact and can be seen as a direct measurement of importance for a given state.

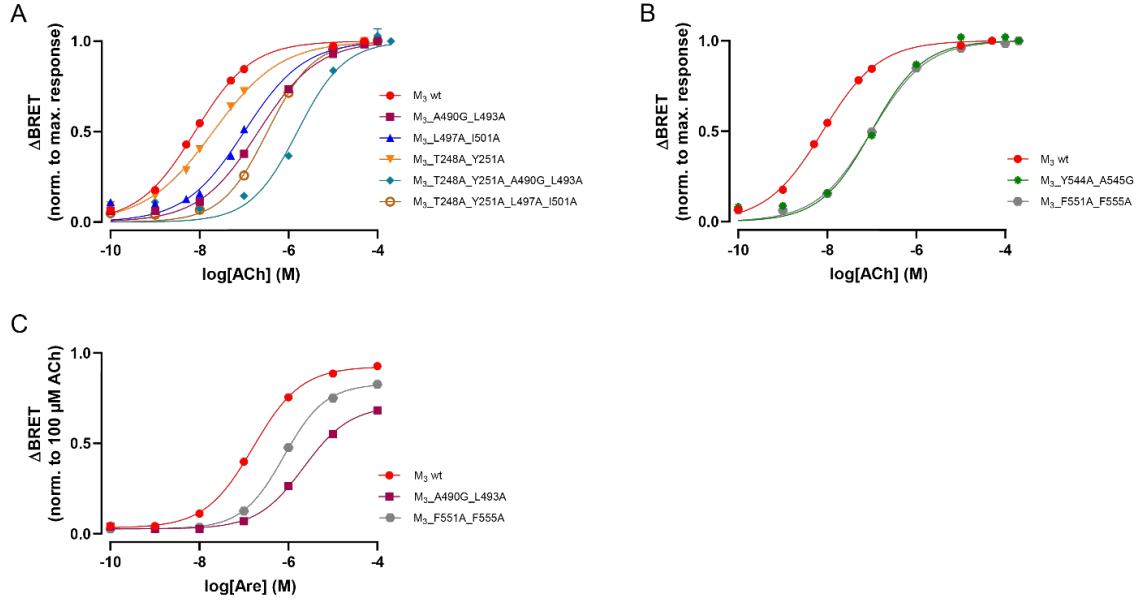

Figure S10: M<sub>3</sub>R-induced G<sub>αq</sub> activation was measured by means of BRET between G<sub>αq</sub>-YFP and nLuc-G<sub>γ</sub> in transiently transfected HEK293T cells. Every well was stimulated with a distinct concentration of agonist as indicated, afterwards with a saturating concentration of acetylcholine. The BRET ratio was normalised to the maximum response of acetylcholine of every well. Concentration-response curves of acetylcholine were plotted for M<sub>3</sub> receptor proteins with mutations in the region of (A) OS5 and (B) OS9 (data set for M<sub>3</sub>R wt is identical in A and B). (C) Concentration response curves of arecoline were plotted for M<sub>3</sub>R wt, OS5-mutated M<sub>3</sub>R and OS9-mutated M<sub>3</sub>R. All data are shown as mean values  $\pm$  SEM for each condition (n=10-15).

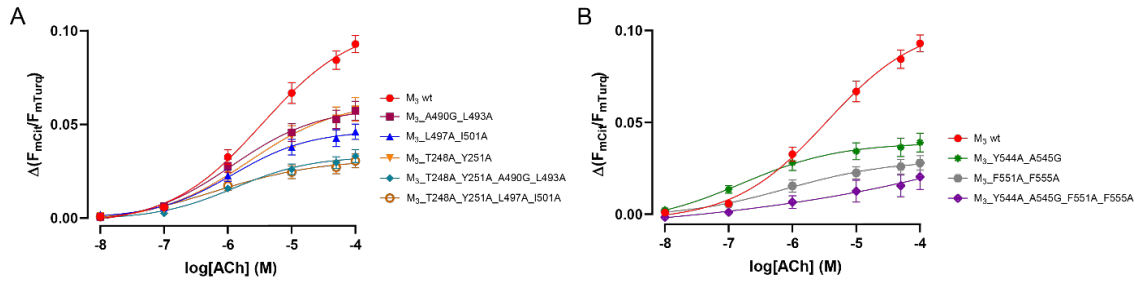

Figure S11: Mutations of the M<sub>3</sub> receptors in regions of (A) OS5 and (B) OS9 affect  $\beta$ -arrestin2 recruitment. M<sub>3</sub>R-mediated  $\beta$ -arrestin2 recruitment was measured in single cells by means of agonist-evoked FRET between mCitrine-tagged M<sub>3</sub> receptors and mTurquoise-tagged  $\beta$ -arrestin2. The cells were stimulated for 30 seconds with each concentration of acetylcholine. The changes in mCitrine/mTurquoise emission ratio of each concentration were plotted as mean values  $\pm$  SEM for each condition. Data set shown for M<sub>3</sub>R wt is identical in panels A and B. All measurements were corrected individually according to the determined expression ratio of fluorescent M<sub>3</sub> receptors and  $\beta$ -arrestin2 to account for the influence of the M<sub>3</sub>R/ $\beta$ -arrestin2 expression ratio on the FRET amplitude (Fig. S15; n=8-14).

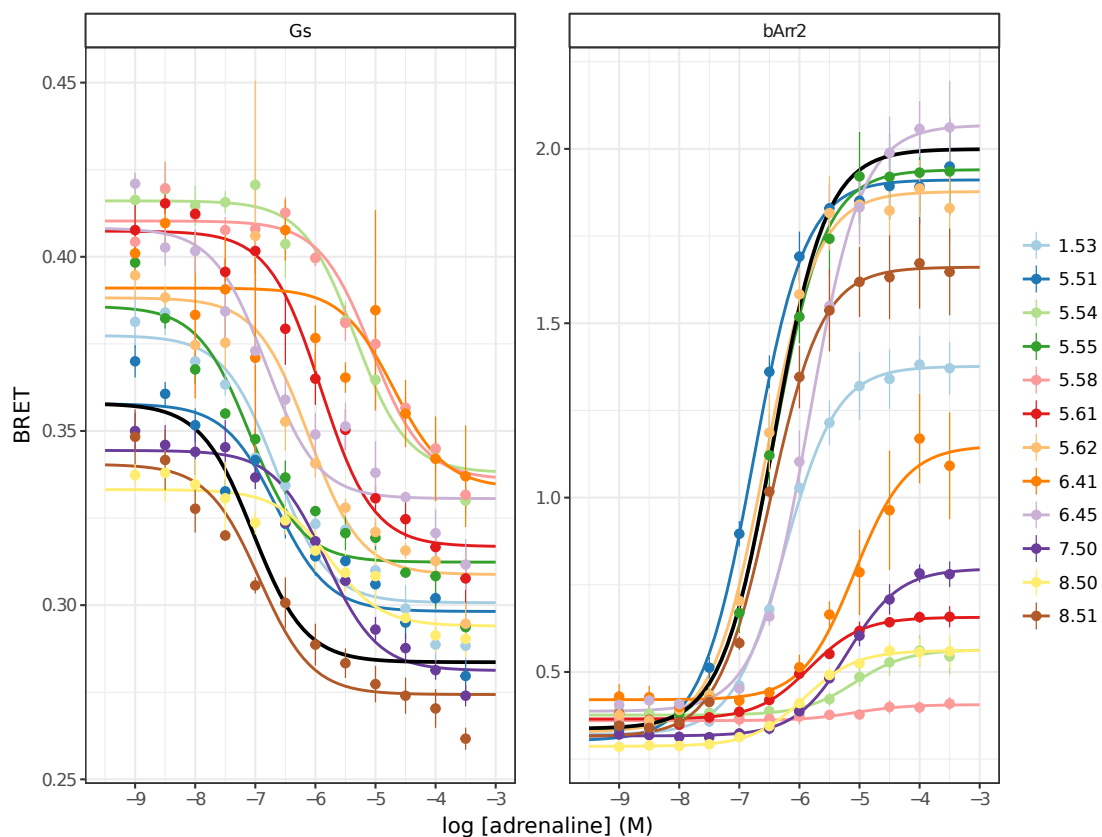

Figure S12: Mutations of the  $\beta_2\text{AR}$  in regions of OS5 and OS9 affect  $G_{\text{os}}$  activation and  $\beta$ -arrestin2 recruitment upon stimulation with adrenaline. Concentration-response curves of at least 3 different measurements are shown.

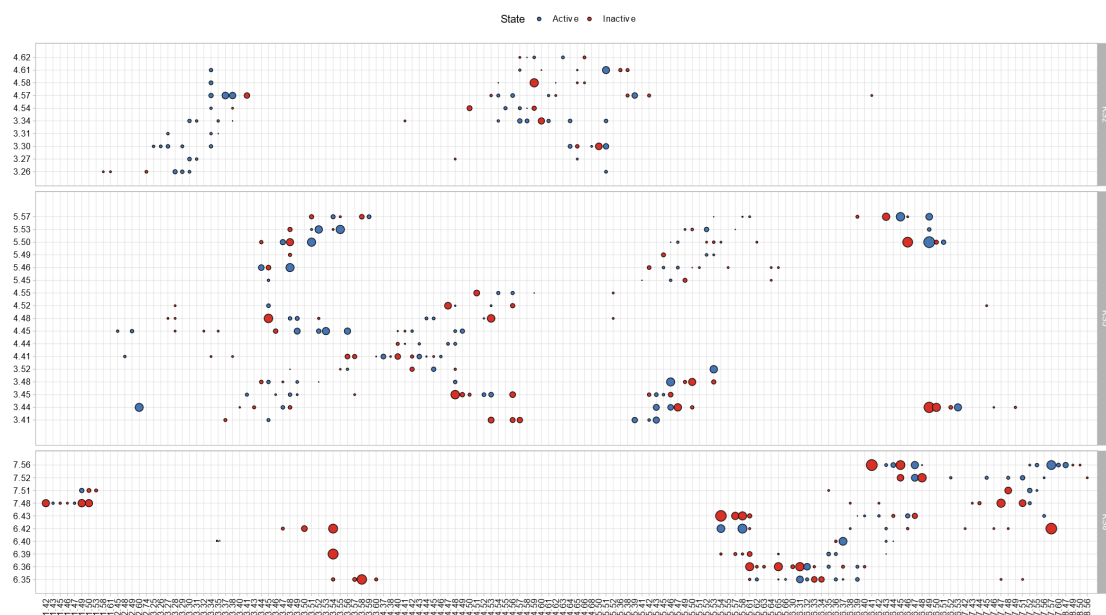

Figure S13: State-specific residue contacts in three known sites of class B1 GPCR structures (Wootten numbering<sup>30</sup>). Points are colored according to the activation state (blue: active, red: inactive). The point size correlates with the normalised PCA coefficient for a given contact and can be seen as a direct measurement of importance for a given state.

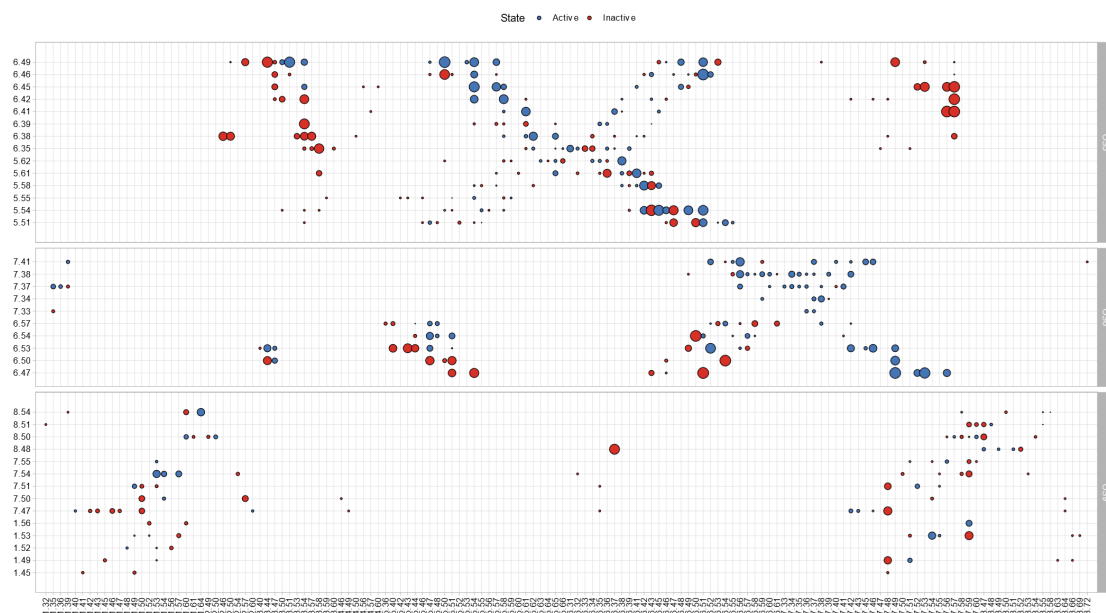

Figure S14: State-specific residue contacts in three orphan sites of class B1 GPCR structures (Wootten numbering<sup>30</sup>). Points are colored according to the activation state (blue: active, red: inactive). The point size correlates with the normalised PCA coefficient for a given contact and can be seen as a direct measurement of importance for a given state.

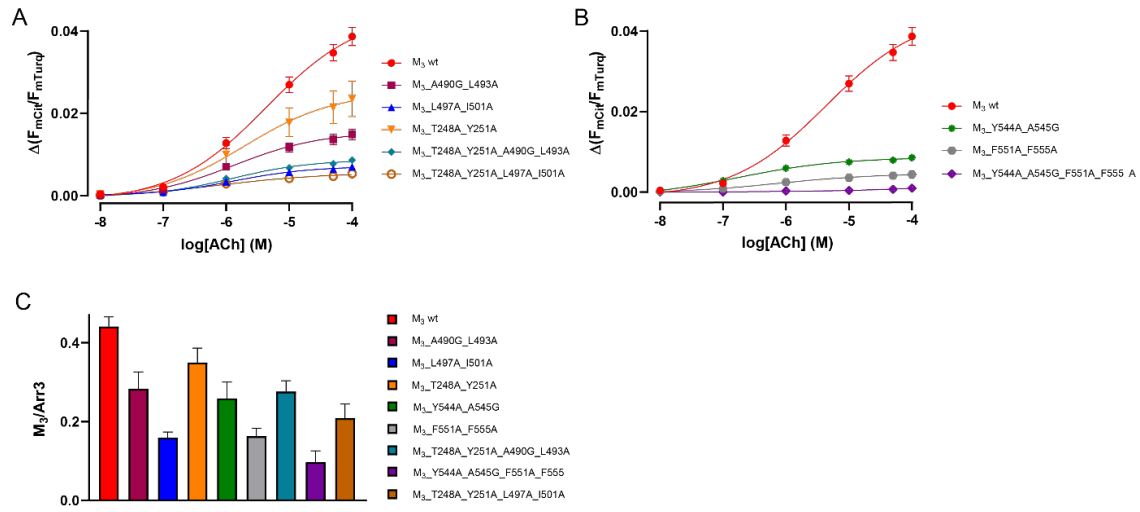

Figure S15: FRET-based single-cell measurement of  $\beta$ -arrestin2 recruitment for OS5-mutated (A) and OS9-mutated (B)  $M_3$  receptors. Shown are the uncorrected measurements of Fig. S11. (C) Different expression levels of the  $M_3$  receptors in relation to  $\beta$ -arrestin2 were observed. The ratio of the mCitrine-tagged  $M_3R$  and the mTurquoise-tagged  $\beta$ -arrestin2 were determined for every cell and normalised to the mCitrine/mTurquoise-ratio of a reference construct ( $n=20$ ) containing both fluorophores. The measurements of (A) and (B) were corrected for an equal expression ratio of  $M_3R$  and  $\beta$ -arrestin2 shown in Fig. S11. All data are shown as mean values  $\pm$  SEM for each condition ( $n=8-14$ ).

## Supplementary Tables

| Molecule                                                                            | Name                        | SMILES                     |
|-------------------------------------------------------------------------------------|-----------------------------|----------------------------|
|    | methanol                    | CO                         |
|    | methanamine                 | C[NH3+]                    |
|    | formate                     | C(=O)[O-]                  |
|    | guanidine cation            | C(=[NH2+])(N)N             |
|   | tetramethyl ammonium cation | C[N+](C)(C)C               |
|  | phosphate3-                 | [O-][P+](([O-])([O-])[O-]) |
|  | phosphate2-                 | [O-][P+](([O-])([O-])[OH]) |
|  | cyclopropane                | C1CC1                      |
|  | oxirane                     | C1CO1                      |

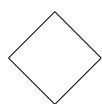

cyclobutane

C1CCC1

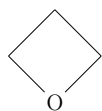

oxetane

C1COC1

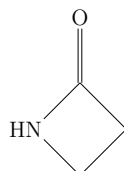

beta-lactam

C1(=O)CCN1

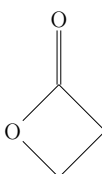

beta-propiolactone

C1(=O)CCO1

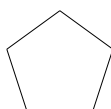

cyclopentane

C1CCCC1

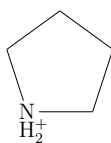

pyrrolidine

C1CC[NH2+]C1

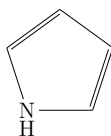

pyrrole

c1cc[nH]c1

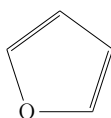

furan

c1ccoc1

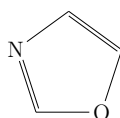

oxazole

c1cocc1

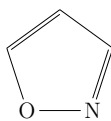

isoxazole

c1cnoc1

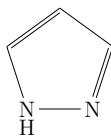

pyrazole

c1cn[nH]c1

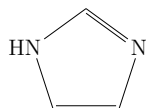

imidazole

c1c[nH]cn1

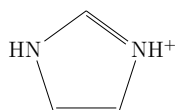

imidazole cation

c1c[nH+][c[nH]]1

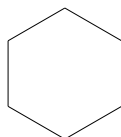

cyclohexane

C1CCCCC1

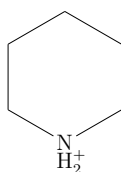

piperidine

C1CC[NH2+]CC1

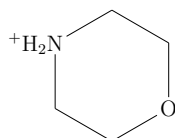

morpholine

C1COCC[NH2+]1

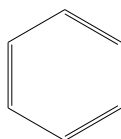

benzene

c1ccccc1

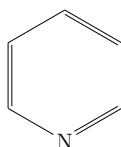

pyridine

c1ccncc1



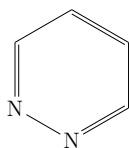

pyridazine

c1ccnnc1

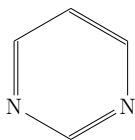

pyrimidine

c1cnncn1

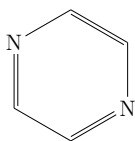

pyrazine

c1cnccn1

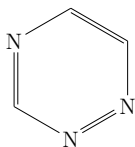

1,2,4-triazine

c1cnncn1

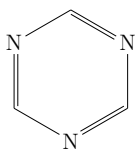

1,3,5-triazine

c1ncnnc1

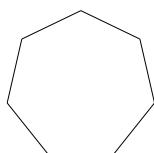

cycloheptane

C1CCCCC1

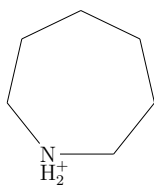

azepane

C1CCC[NH2+]CC1

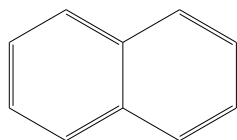

naphthalene

c1ccc2ccccc2c1

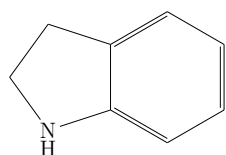

indoline

c1ccc2c(c1)CCN2

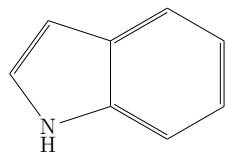

indole

c1ccc2c(c1)cc[nH]2

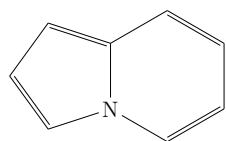

indolizine

c1cc2ccccn2c1

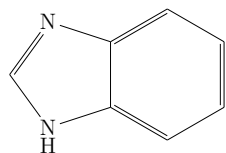

benzimidazole

c1ccc2c(c1)nc[nH]2

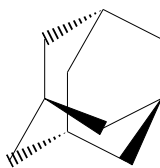

adamantane

C1[C@H]2C[C@H]3C[C@@H]1C[C@@H](C2)C3

---

Table S1: Small molecular probes used for docking.

| Receptor group         | Receptor ID       | PDB ID | Pocket   | Compounds ID |
|------------------------|-------------------|--------|----------|--------------|
| Opsins                 | Rhodopsin         | 2PED   | KS7, KS8 | HTG          |
| Adrenoceptor           | $\beta_1$ AR      | 2VT4   | KS10     | SOG          |
| Adrenoceptor           | $\beta_1$ AR      | 2Y01   | KS5      | Y01          |
| Adrenoceptor           | $\beta_1$ AR      | 2Y02   | KS5      | Y01          |
| Adrenoceptor           | $\beta_1$ AR      | 2Y03   | KS5      | Y01          |
| Adrenoceptor           | $\beta_1$ AR      | 2Y04   | KS5      | Y01          |
| Adrenoceptor           | $\beta_1$ AR      | 2YCX   | KS2      | SOG          |
| Adrenoceptor           | $\beta_1$ AR      | 2YCY   | KS2      | SOG          |
| Opsins                 | Rhodopsin         | 2Z73   | KS7      | BOG          |
| Opsins                 | Rhodopsin         | 3AYM   | KS11     | BOG          |
| Adrenoceptor           | $\beta_2$ AR      | 3D4S   | KS5      | OLC          |
| Opsins                 | Rhodopsin         | 3OAX   | KS7, KS8 | HTG          |
| Neurotensin            | NTR1              | 4BUO   | KS2      | GLY          |
| Opioid                 | NOP               | 4EA3   | KS5      | OLB          |
| 5-hydroxytryptamine    | 5HT <sub>2B</sub> | 4IB4   | KS5      | OLC, PEG     |
| Frizzled               | SMO               | 4JKV   | KS1, KS3 | OLC,OLA      |
| Glucagon               | GCGR              | 4L6R   | KS2      | PEG          |
| Opioid                 | $\delta$ OR       | 4N6H   | KS5      | OLA          |
| 5-hydroxytryptamine    | 5HT <sub>2B</sub> | 4NC3   | KS1      | OLC, PEG     |
| P2Y                    | P2Y12             | 4NTJ   | KS5      | OLC          |
| Metabotropic glutamate | mGlu5             | 4OO9   | SODIUM   | MES          |
| Metabotropic glutamate | mGlu1             | 4OR2   | KS1      | CLR          |
| Free fatty acid        | FFA1              | 4PHU   | KS2,KS5  | OLC, 2YB     |
| Opioid                 | $\delta$ OR       | 4RWA   | KS5      | OLC          |
| Opsin                  | Rhodopsin         | 4WW3   | KS11     | BOG          |
| Neurotensin            | NTR1              | 4XEE   | KS4      | 1PE          |
| P2Y                    | P2Y1R             | 4XNV   | KS5      | Y01          |
| Metabotropic glutamate | mGlu5             | 5CGC   | SODIUM   | MES,51D      |
| Adrenoceptors          | $\beta_2$ AR      | 5D5A   | KS2      | BU1          |
| Opioid                 | NOP               | 5DHG   | KS2,KS2  | OLA          |

|                        |                   |      |            |          |
|------------------------|-------------------|------|------------|----------|
| Opioid                 | NOP               | 5DHH | KS2        | OLA      |
| Adrenoceptors          | $\beta_1$ AR      | 5F8U | KS2        | CLR      |
| Adenosine              | A <sub>2A</sub> R | 5IU7 | KS5        | OLA      |
| Adenosine              | A <sub>2A</sub> R | 5IU8 | KS11,KS5   | HT0, OLA |
| Adenosine              | A <sub>2A</sub> R | 5IUB | KS5        | OLA      |
| Adenosine              | A <sub>2A</sub> R | 5K2A | KS5        | OLA      |
| Adenosine              | A <sub>2A</sub> R | 5K2B | KS5        | OLA      |
| Adenosine              | A <sub>2A</sub> R | 5K2C | KS5        | OLA      |
| Adenosine              | A <sub>2A</sub> R | 5K2D | KS5        | OLA      |
| Chemokine              | CCR9              | 5LWE | KS5        | OLA      |
| Adenosine              | A <sub>2A</sub> R | 5NM4 | KS1        | OLA      |
| Adenosine              | A <sub>2A</sub> R | 5OLO | KS2        | OLA      |
| Adenosine              | A <sub>2A</sub> R | 5OLV | KS5        | OLA      |
| Adenosine              | A <sub>2A</sub> R | 5OLZ | KS5,KS1    | OLA      |
| Adenosine              | A <sub>2A</sub> R | 5OM1 | KS5        | OLA      |
| Adenosine              | A <sub>2A</sub> R | 5OM4 | KS5        | OLA      |
| 5-hydroxytryptamine    | 5HT <sub>2B</sub> | 5TVN | KS11       | PEG      |
| Cannabinoid            | CB1               | 5U09 | KS5        | PEG      |
| Adenosine              | A <sub>2A</sub> R | 5UIG | KS11       | EDT      |
| Adenosine              | A <sub>2A</sub> R | 5VRA | KS5        | OLA      |
| Dopamine               | D4                | 5WIV | KS5        | OLA      |
| Endothelin             | ETb               | 5X93 | KS2        | OLC      |
| Lysophospholipid       | LPA               | 5XSZ | KS5        | OLC      |
| Cannabinoid            | CB1               | 5TZY | KS2        | CLR      |
| 5-Hydroxytryptamine    | 5HT <sub>2A</sub> | 6A93 | KS2,KS3    | CLR,1PE  |
| 5-Hydroxytryptamine    | 5HT <sub>2A</sub> | 6A94 | KS2        | CLR      |
| 5-Hydroxytryptamine    | 5HT <sub>2A</sub> | 6BQH | KS2        | CLR      |
| Dopamine               | D2                | 6CM4 | KS10       | OLA      |
| Prostanoid             | PGD2              | 6D27 | SODIUM     | PGE, PG0 |
| Metabotropic glutamate | mGlu5             | 6FFH | KS2,SODIUM | OLC      |
| Metabotropic glutamate | mGlu5             | 6FFI | KS5,SODIUM | OLC      |
| Chemokine              | CCR2A             | 6GPX | KS7,KS8    | OLA      |

|                                |                   |      |                     |             |
|--------------------------------|-------------------|------|---------------------|-------------|
| Adenosine                      | A <sub>2A</sub> R | 6GT3 | KS5                 | OLA         |
| Tachykinin                     | NK1R              | 6HLO | KS1,KS2,KS5,KS7,KS8 | OLA,OLC     |
| Tachykinin                     | NK1R              | 6HLP | KS5,KS7,KS8,KS1     | OLA,OLC,PEG |
| Succinate                      | GPR91             | 6IBB | KS1,KS2             | OLC         |
| Endothelin                     | ETb               | 6IGK | KS2                 | OLC         |
| Prostanoid                     | TP                | 6IIU | KS5                 | OLC         |
| Adenosine                      | A <sub>2A</sub> R | 6JZH | KS1                 | OLA         |
| Endothelin                     | ETb               | 6K1Q | KS2                 | OLC         |
| Adrenoceptors                  | $\alpha_{2B}$ AR  | 6K42 | KS2                 | OLA         |
| Cannabinoid                    | CB <sub>1</sub>   | 6KQI | KS5                 | PEG         |
| Adrenoceptors                  | $\alpha_{2C}$ AR  | 6KUW | KS5                 | OLC         |
| Chemokine                      | CXCR2             | 6LFM | KS2                 | CLR         |
| Orphans                        | GPR52             | 6LI1 | KS11                | PEG         |
| Endothelin                     | ETb               | 6LRY | KS7,KS8             | CLR,PLM     |
| Dopamine                       | D2                | 6LUQ | KS5                 | OLA         |
| Melatonin                      | MT1               | 6ME2 | KS7,KS8             | OLA         |
| Melatonin                      | MT1               | 6ME3 | KS7,KS8             | OLA         |
| Melatonin                      | MT1               | 6ME5 | KS7,KS8             | OLA         |
| Cannabinoid                    | CB <sub>1</sub>   | 6N4B | KS5                 | CLR         |
| Parathyroid hormone            | PTH1R             | 6NBF | KS2,KS5             | CLR, PLM    |
| Parathyroid hormone            | PTH1R             | 6NBH | KS2,KS5             | CLR         |
| Frizzeld                       | SMO               | 6O3C | KS5                 | OLB         |
| Adrenoceptors                  | $\beta_2$ AR      | 6OBA | KS2,KS5             | CLR,M3J     |
| Formylpeptide                  | FPR2              | 6OMM | KS7,KS8             | PLM         |
| Angiotensin                    | AT1R              | 6OS0 | KS11                | Cl          |
| Angiotensin                    | AT1R              | 6OS1 | KS5                 | OLC         |
| Angiotensin                    | AT1R              | 6OS2 | KS5, ORTHO2         | OLC, NH2    |
| Corticotropin-releasing factor | CRF1R             | 6PB0 | KS2                 | CLR         |
| Corticotropin-releasing factor | CRF1R             | 6PB1 | KS7,KS8             | CLR         |
| Adrenoceptors                  | $\beta_2$ AR      | 6PRZ | KS5                 | OLC         |
| Adrenoceptors                  | $\beta_2$ AR      | 6PS0 | KS11,KS7,KS8        | SO4         |
| Adrenoceptors                  | $\beta_2$ AR      | 6PS1 | KS11                | SO4         |

|               |                   |      |                 |             |
|---------------|-------------------|------|-----------------|-------------|
| Adrenoceptors | $\beta_2$ AR      | 6PS2 | KS2,KS5         | CLR,OLC,OLB |
| Adrenoceptors | $\beta_2$ AR      | 6PS3 | KS2,KS5         | CLR,OLC     |
| Adrenoceptors | $\beta_2$ AR      | 6PS4 | KS5             | OLC         |
| Adrenoceptors | $\beta_2$ AR      | 6PS6 | KS5             | OLC         |
| Adenosine     | A <sub>2A</sub> R | 6PS7 | KS5             | OLA         |
| Cannabinoid   | CB <sub>1</sub>   | 6PT0 | ORTHO2          | PLM         |
| Succinate     | SUCR1             | 6RNK | KS5             | OLC         |
| Leukotriene   | CysLT2            | 6RZ4 | KS5,KS7         | OLC         |
| Leukotriene   | CysLT2            | 6RZ5 | KS2,KS5,KS7     | OLA         |
| Leukotriene   | CysLT2            | 6RZ6 | KS1,KS5,KS7     | OLC         |
| Leukotriene   | CysLT2            | 6RZ9 | KS1,KS2,KS5,KS7 | OLA,OLC     |
| Adenosine     | A <sub>2A</sub> R | 6S0Q | KS1,KS5         | OLA         |
| Orexin        | OX1               | 6TO7 | KS2,KS5         | SOG         |
| Orexin        | OX1               | 6TOS | KS2             | SOG         |
| Orexin        | OX1               | 6TOT | KS2             | SOG,PG4     |
| Orexin        | OX1               | 6TP6 | ORTHO2          | NT5,PG4     |
| Orexin        | OX1               | 6TPG | KS5             | OLA         |
| Orexin        | OX1               | 6TPJ | KS5,ORTHO2      | PG4         |
| Orexin        | OX1               | 6TPN | KS2,KS5         | OLA         |
| Orexin        | OX1               | 6TQ4 | KS5,ORTHO2      | SOG         |
| Orexin        | OX1               | 6TQ6 | KS5,KS11        | SOG,SO4     |
| Orexin        | OX1               | 6TQ7 | KS7,ORTHO2      | SOG,NVK     |
| Orexin        | OX1               | 6TQ9 | KS7,ORTHO2      | SOG,NVK     |
| Calcitonin    | AM                | 6UUN | KS2             | CLR         |
| Orexin        | OX1               | 6V9S | KS1,ORTHO2      | CLR,JHC     |
| Melanocortin  | MC4R              | 6W25 | KS7,KS8         | OLA         |
| Succinate     | GPR91             | 6Z10 | KS5             | OLC         |
| Adenosine     | A <sub>2A</sub> R | 6ZDR | KS5             | OLA         |
| Bile acid     | GPBA              | 7CFM | KS5             | CLR         |
| Dopamine      | D1                | 7JVP | KS2             | CLR         |
| Dopamine      | D1                | 7LJC | KS2             | CLR         |

---

---

Table S2: List of GPCR structures with a ligand different than a possible synthetic allosteric ligand in the corresponding binding pocket

| Substructure            | SMARTS                                                                                                                                                                                                                      |
|-------------------------|-----------------------------------------------------------------------------------------------------------------------------------------------------------------------------------------------------------------------------|
| Hydrogen bond donors    | <chem>[\$([N;!H0;v3,v4&amp;+1]),\$([O,S;H1;+0]),n&amp;H1&amp;+0]</chem>                                                                                                                                                     |
| Hydrogen bond acceptors | <chem>[\$([O,S;H1;v2;!\$(*-*=[O,N,P,S])),\$([O,S;H0;v2]),\$([O,S;-]),\$([N;v3;!\$(N-*=[O,N,P,S]))),n&amp;H0&amp;+0,\$([o,s;+0;!\$([o,s]:n);!\$([o,s]:c:n)])]</chem>                                                         |
| Aromatic atoms          | <chem>[a]</chem>                                                                                                                                                                                                            |
| Halogens                | <chem>[F,Cl,Br,I]</chem>                                                                                                                                                                                                    |
| Basic substructures     | <chem>[#7;+,\$([N;H2&amp;+0]!\$([C,a];!\$([C,a](=O)))),\$([N;H1&amp;+0](\$([C,a];!\$([C,a](=O))))\$([C,a];!\$([C,a](=O)))),\$([N;H0&amp;+0]([C;!\$(C(=O))])\$([C;!\$(C(=O))])\$([C;!\$(C(=O))])\$([C;!\$(C(=O))])])]</chem> |
| Acidic substructures    | <chem>[\$([C,S](=[O,S,P])-[O;H1,-1])]</chem>                                                                                                                                                                                |
| Aliphatic rings         | <chem>[R!a]</chem>                                                                                                                                                                                                          |
| Everything              | <chem>[*]</chem>                                                                                                                                                                                                            |

Table S3: Substructures used for extraction of molecular features.
